# Supplementary material
Source: PubMed Central journal article supplement (PMC4675204)
Supplement: i1552-5783-56-12-7398-s03.pdf [file i1552-5783-56-12-7398-s03.pdf]

A)

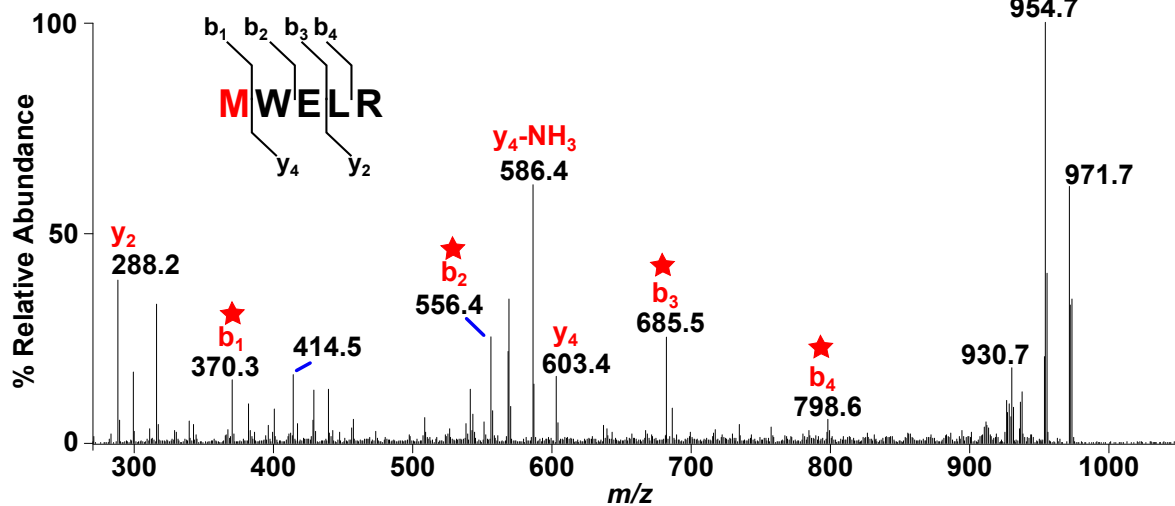

B)

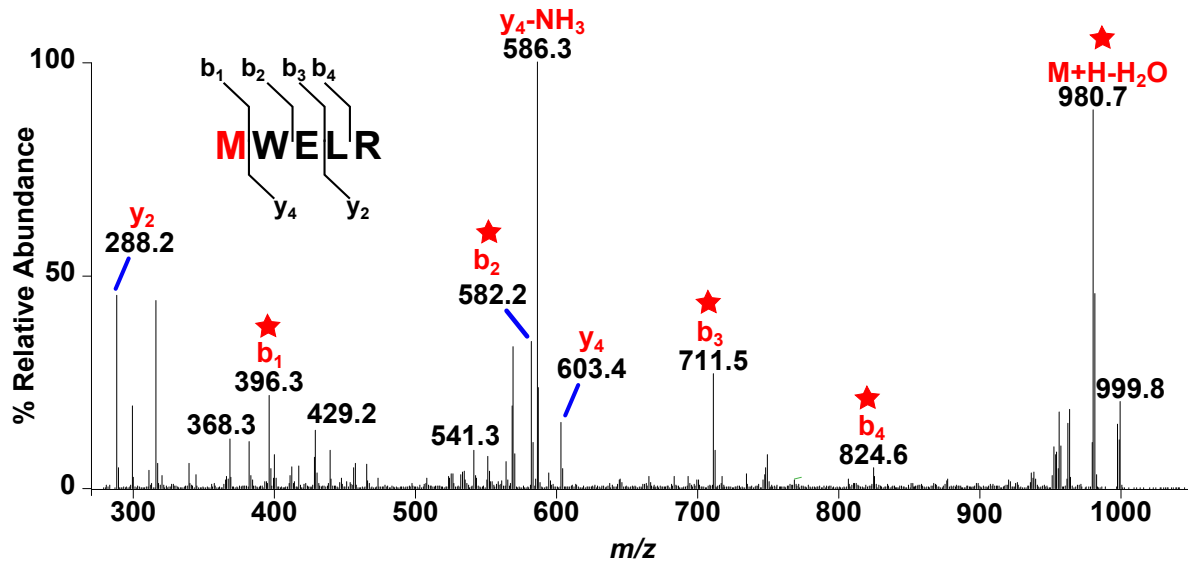

**Figure S3.** Tandem mass spectra confirming lipid modification of AQP0 in 4 month lens.

(A) CID spectrum of singly-charged AQP0 peptide 1-5,  $m/z$  972.6, with the addition of palmitic acid ( $m/z$  238).

(B) CID spectrum of singly-charged AQP0 peptide 1-5,  $m/z$  998.6, with the addition of oleic acid ( $m/z$  264).
